# Supplementary material for: Crosslinking of the Pd(acacCN)2 building unit with Ag(i) salts: dynamic 1D polymers and an extended 3D network
Source: Royal Society of Chemistry journal article supplement (doi:10.1039/c5ce00043b), 2015-01-01
Supplement: c5ce00043b1.pdf [file c5ce00043b1.pdf]

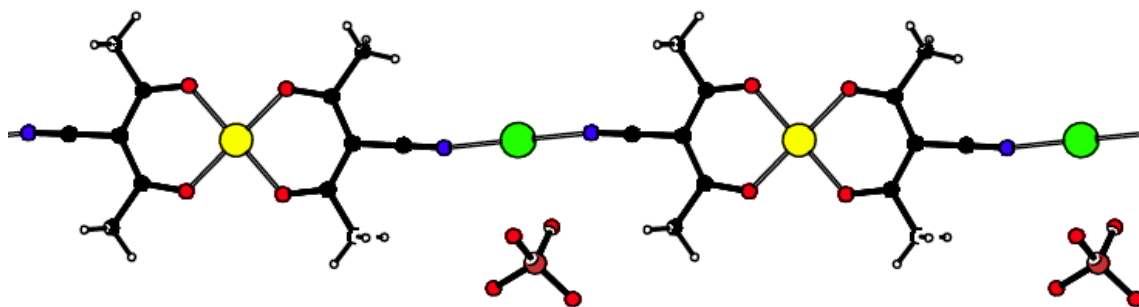

low temperature  
structure

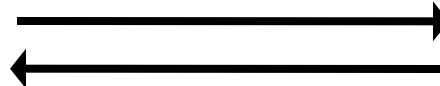

high temperature  
structure

structural  
phase transition in  
compound **2**

subgroup

space group
