# Supplementary material for: Crosslinking of the Pd(acacCN)2 building unit with Ag(i) salts: dynamic 1D polymers and an extended 3D network
Source: Royal Society of Chemistry journal article supplement (doi:10.1039/c5ce00043b), 2015-01-01
Supplement: c5ce00043b2.pdf [file c5ce00043b2.pdf]

# Crosslinking of the Pd(acacCN)<sub>2</sub> building unit with Ag(I) salts: dynamic 1D polymers and an extended 3D network<sup>†</sup>

Qianqian Guo,<sup>a</sup> Carina Merckens,<sup>a</sup> Runze Si,<sup>b</sup> and Ulli Englert<sup>\*a</sup>

*Received Xth XXXXXXXXXX 20XX, Accepted Xth XXXXXXXXXX 20XX*

*First published on the web Xth XXXXXXXXXX 200X*

DOI: 10.1039/b000000x

## Supplementary Information

---

<sup>a</sup> Institute of Inorganic Chemistry, RWTH Aachen University, Aachen, Germany. Fax: +49-241-8092288; Tel: +49-241-8094666; E-mail: ullrich.englert@ac.rwth-aachen.de

<sup>b</sup> Carleton College, 300 North College Street, Northfield, MN, USA. Tel: +1-612-8021080; Email: sir@carleton.edu.

---

## List of Figures

|     |                                                                                                             |    |
|-----|-------------------------------------------------------------------------------------------------------------|----|
| S1  | Displacement ellipsoid plot of the asymmetric unit in <b>1</b> . . . . .                                    | 3  |
| S2  | Displacement ellipsoid plot of the asymmetric unit in <b>2α</b> . . . . .                                   | 3  |
| S3  | Displacement ellipsoid plot of 1D chain in <b>2β</b> . . . . .                                              | 4  |
| S4  | Displacement ellipsoid plot of the asymmetric unit in <b>3α</b> . . . . .                                   | 4  |
| S5  | Displacement ellipsoid plot of 1D chain in <b>3β</b> . . . . .                                              | 5  |
| S6  | Displacement ellipsoid plot of the asymmetric unit in <b>5</b> . . . . .                                    | 5  |
| S7  | Displacement ellipsoid plot of the asymmetric unit in <b>6</b> . . . . .                                    | 6  |
| S8  | Displacement ellipsoid plot of the asymmetric unit in <b>7</b> . . . . .                                    | 6  |
| S9  | Simulated and experimental powder patterns for wet and dry samples of <b>2</b> . . . . .                    | 7  |
| S10 | Simulated and experimental powder patterns for wet and dry samples of <b>3</b> . . . . .                    | 7  |
| S11 | Simulated and experimental powder patterns for wet and dry samples of <b>5</b> . . . . .                    | 8  |
| S12 | Simulated and experimental powder patterns of <b>7</b> . . . . .                                            | 8  |
| S13 | Ratio $I(f/t)$ as a function of temperature for the sum of all reflection intensities in <b>2</b> . . . . . | 9  |
| S14 | Ratio $I(f/t)$ as a function of temperature for the sum of all reflection intensities in <b>3</b> . . . . . | 9  |
| S15 | Intensity of individual reflections $hkl$ , $h+k = 2n+1$ in <b>2</b> as a function of temperature. . . . .  | 10 |
| S16 | Intensity of individual reflections $hkl$ , $h+k = 2n+1$ in <b>3</b> as a function of temperature. . . . .  | 10 |
| S17 | Intensity of individual reflections $hkl$ , $h+k = 2n+1$ in <b>4</b> as a function of temperature. . . . .  | 11 |
| S18 | $^{19}\text{F}$ NMR spectrum of compound <b>4</b> in $\text{D}_2\text{O}$ . . . . .                         | 12 |

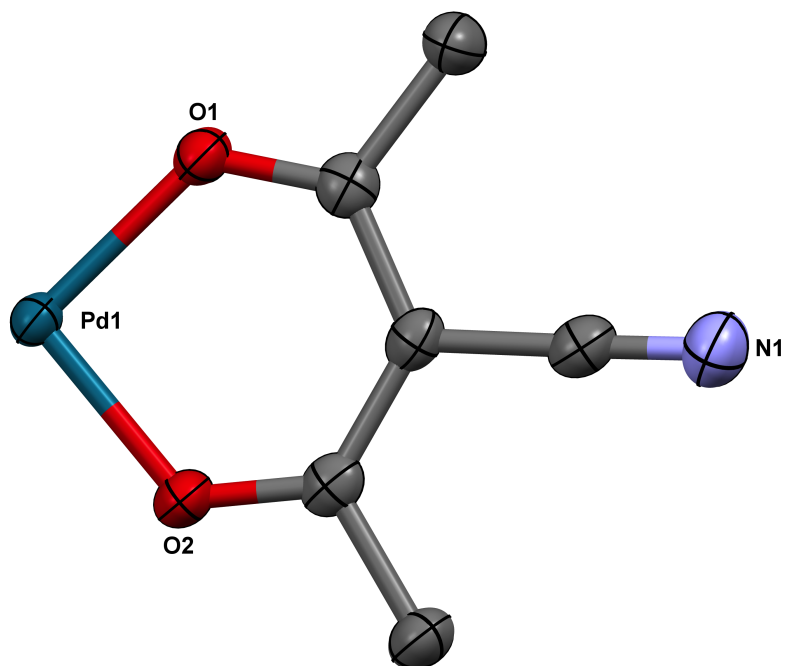

**Fig. S1** Displacement ellipsoid plot of the asymmetric unit in **1**. Ellipsoids are drawn at 75 % probability and hydrogen atoms are omitted for clarity.

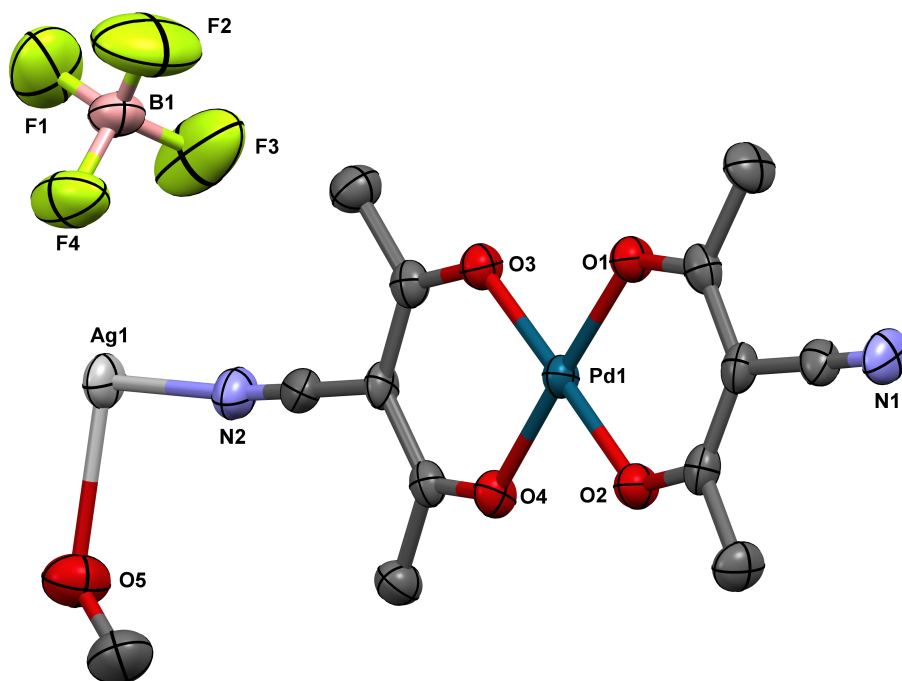

**Fig. S2** Displacement ellipsoid plot of the asymmetric unit in **2α**. Ellipsoids are drawn at 75 % probability and hydrogen atoms are omitted for clarity.

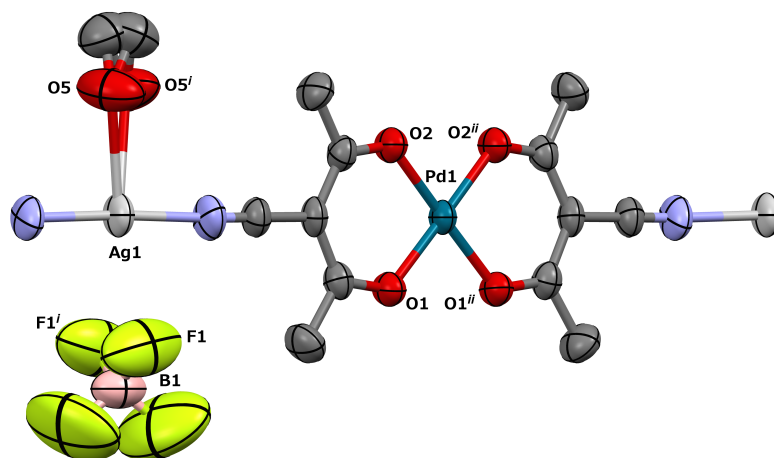

**Fig. S3** Displacement ellipsoid plot of 1D chain in **2β**. Ellipsoids are drawn at 50 % probability and hydrogen atoms are omitted for clarity. Symmetry operators:  $i = 2-x, y, 0.5-z$ ;  $ii = 1-x, y, 1.5-z$ .

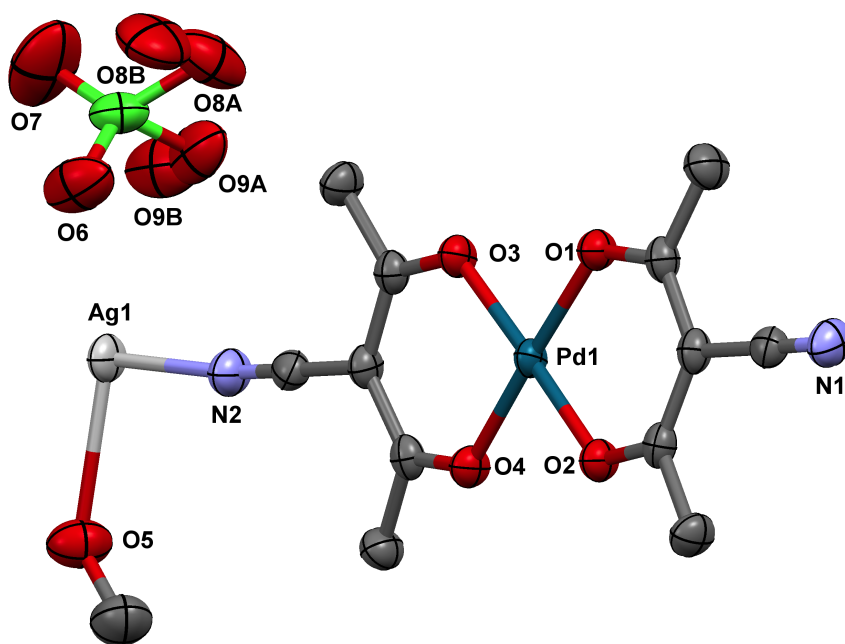

**Fig. S4** Displacement ellipsoid plot of the asymmetric unit in **3α**. Ellipsoids are drawn at 75 % probability and hydrogen atoms are omitted for clarity.

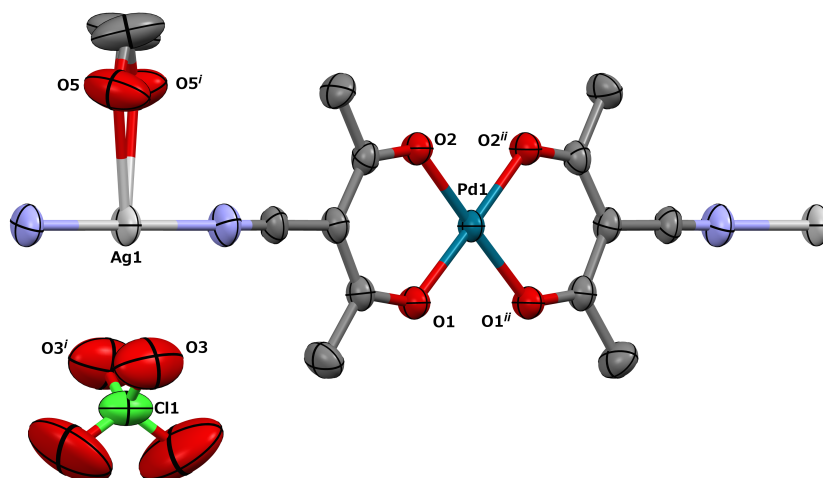

**Fig. S5** Displacement ellipsoid plot of the 1D chain in **3β**. Ellipsoids are drawn at 50 % probability and hydrogen atoms are omitted for clarity. Symmetry operators:  $i = 2-x, y, 0.5-z$ ;  $ii = 1-x, y, 1.5-z$ .

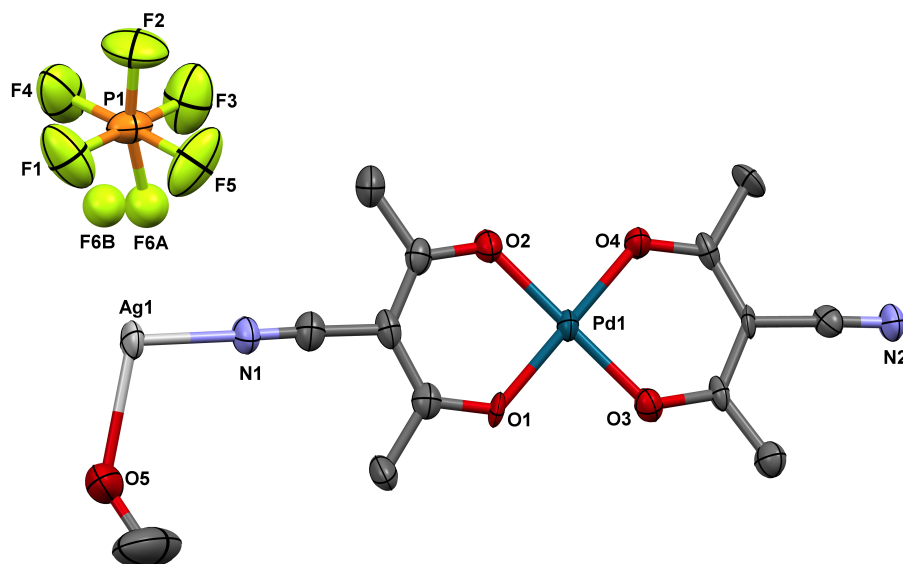

**Fig. S6** Displacement ellipsoid plot of the asymmetric unit in **5**. Ellipsoids are drawn at 75 % probability and hydrogen atoms are omitted for clarity.

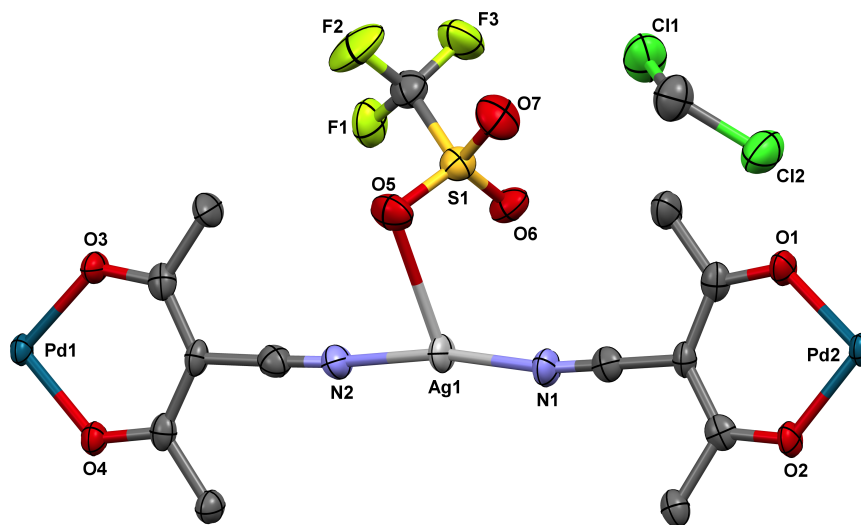

**Fig. S7** Displacement ellipsoid plot of the asymmetric unit in **6**. Ellipsoids are drawn at 75 % probability and hydrogen atoms are omitted for clarity.

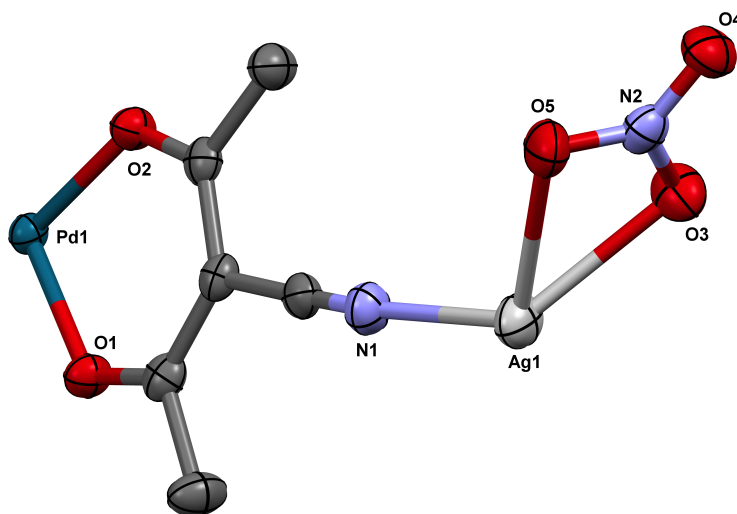

**Fig. S8** Displacement ellipsoid plot of the asymmetric unit in **7**. Ellipsoids are drawn at 75 % probability and hydrogen atoms are omitted for clarity.

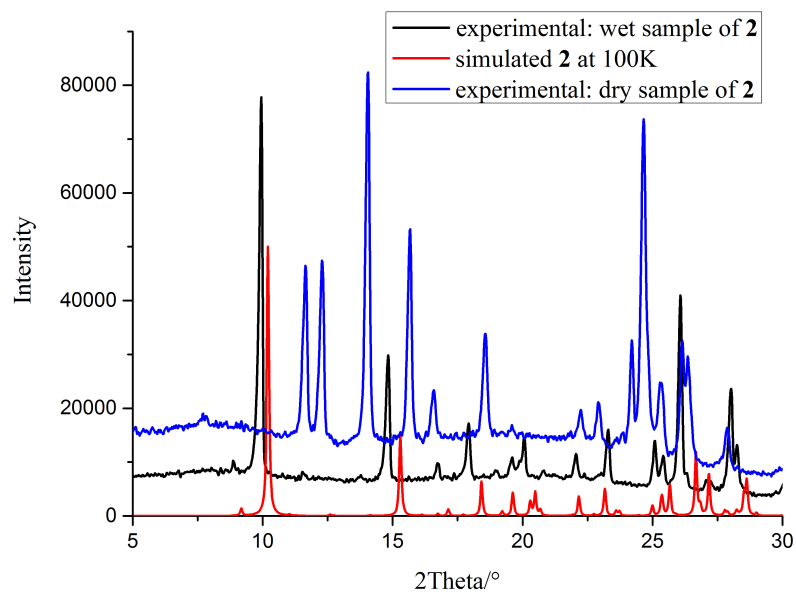

**Fig. S9** Simulated and experimental powder patterns for wet and dry samples of **2**.

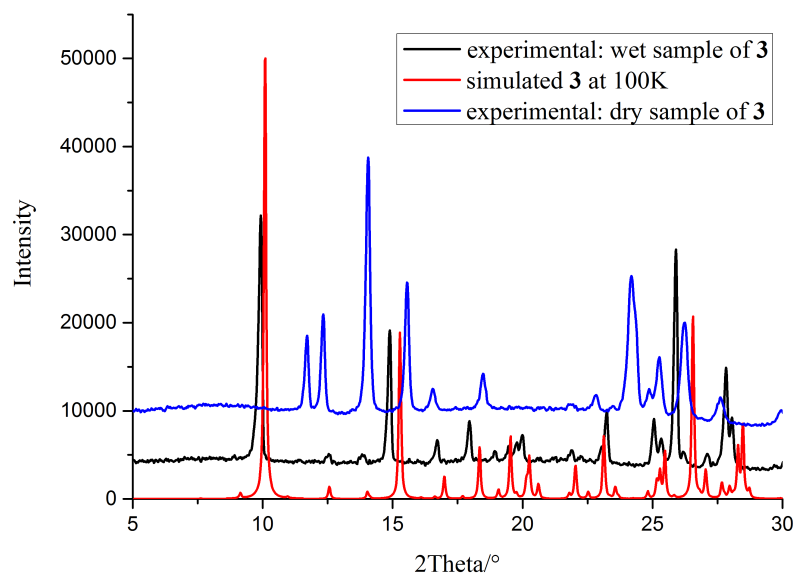

**Fig. S10** Simulated and experimental powder patterns for wet and dry samples of **3**.

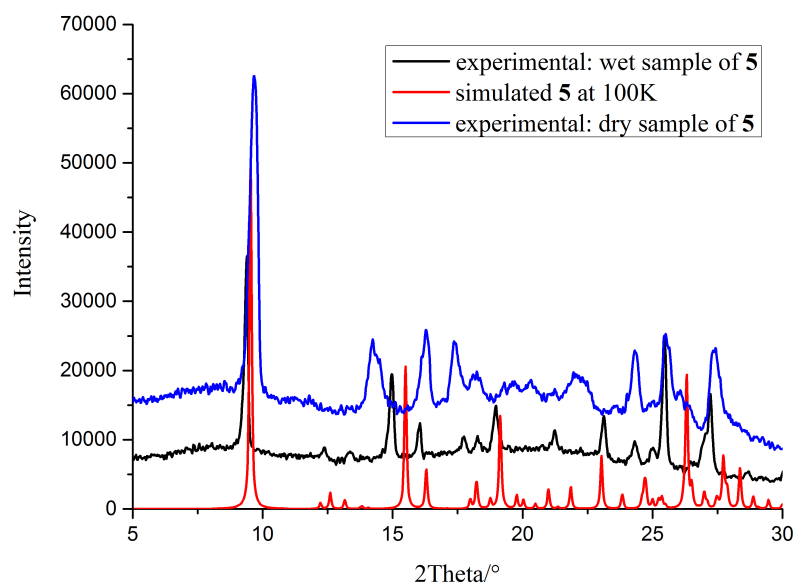

**Fig. S11** Simulated and experimental powder patterns for wet and dry samples of **5**.

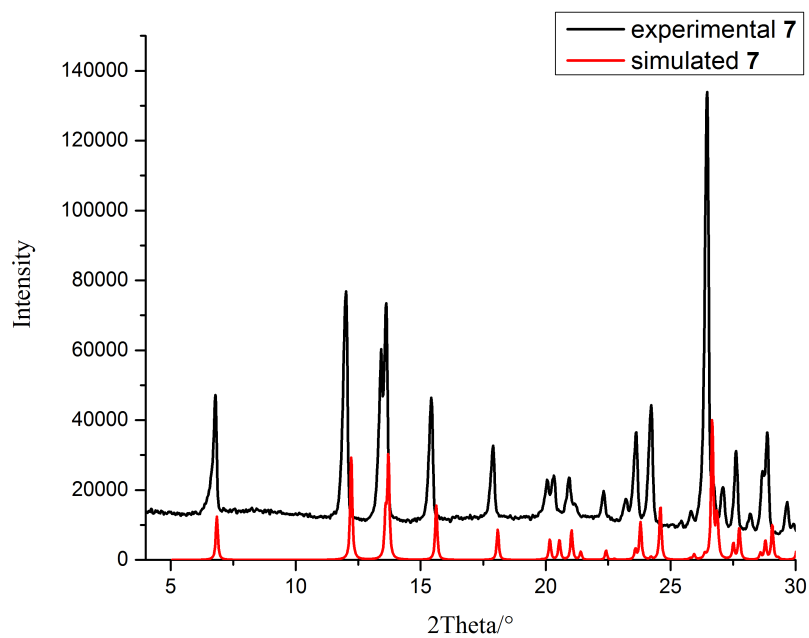

**Fig. S12** Simulated and experimental powder patterns of **7**.

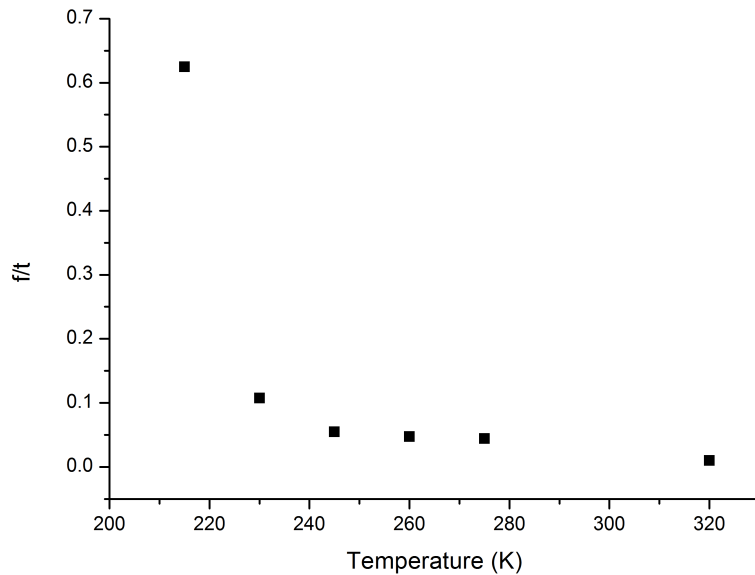

**Fig. S13** Ratio  $I(f/t)$  as a function of temperature for the sum of all reflection intensities in **2**. In this preliminary experiment, the phase transition temperature was determined approximately.

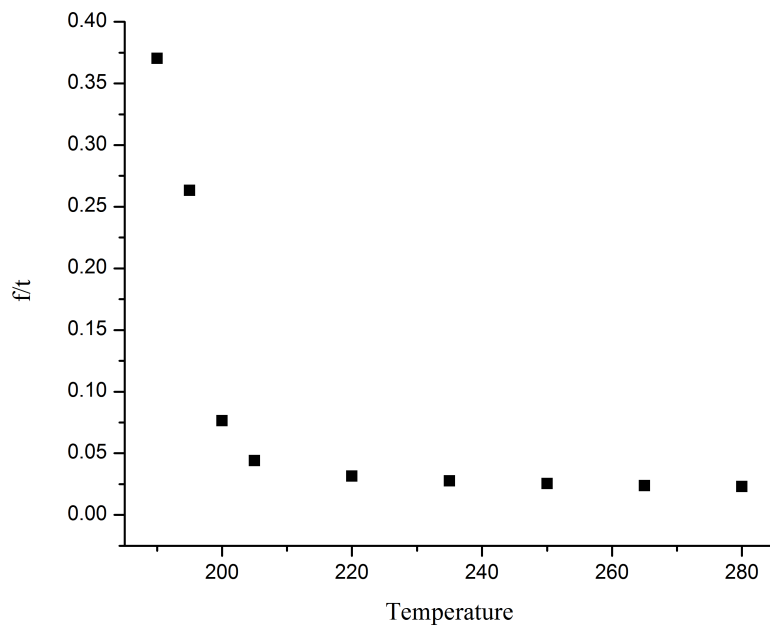

**Fig. S14** Ratio  $I(f/t)$  as a function of temperature for the sum of all reflection intensities in **3**. In this preliminary experiment, the phase transition temperature was determined approximately.

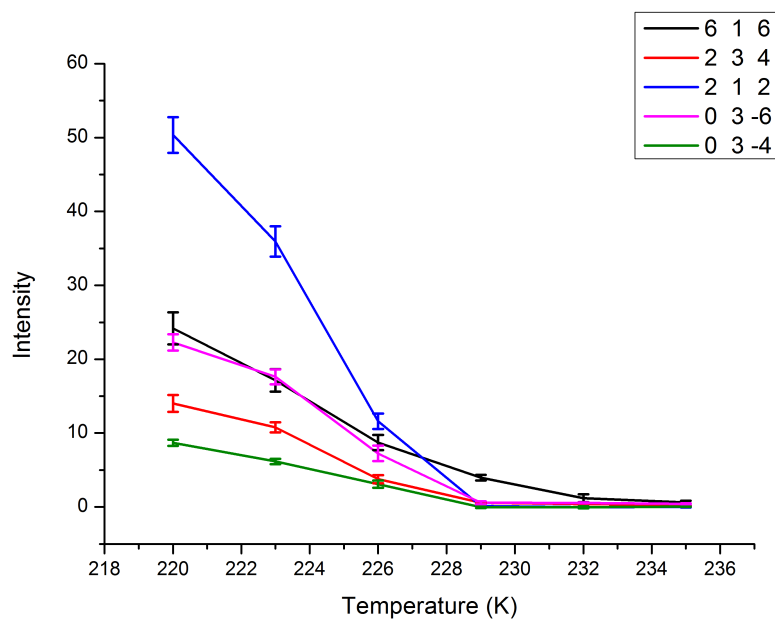

**Fig. S15** Intensity of individual reflections  $hkl$ ,  $h+k = 2n+1$  in **2** as a function of temperature.

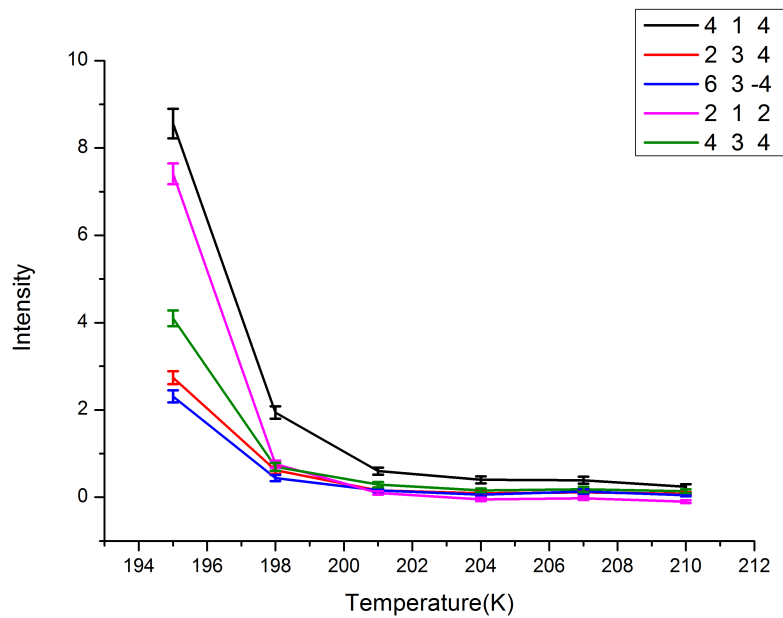

**Fig. S16** Intensity of individual reflections  $hkl$ ,  $h+k = 2n+1$  in **3** as a function of temperature.

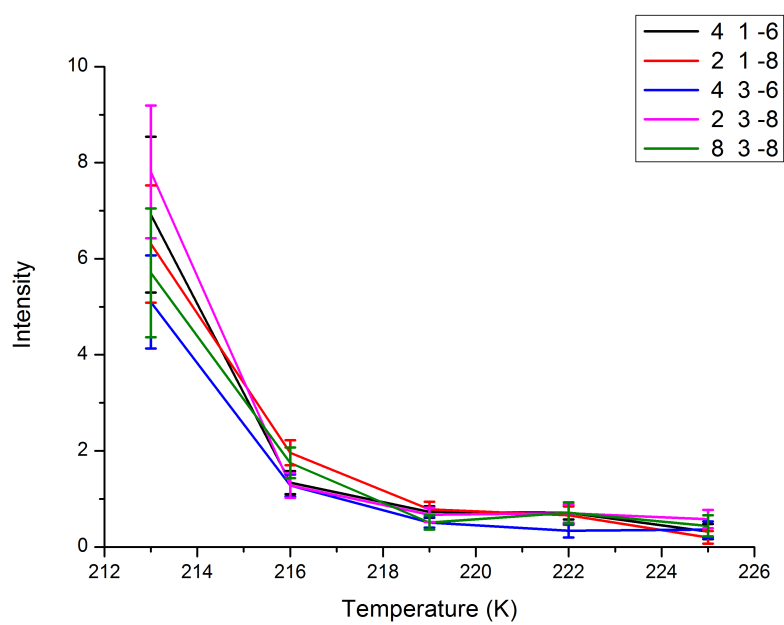

**Fig. S17** Intensity of individual reflections  $hkl$ ,  $h+k = 2n+1$  in **4** as a function of temperature.

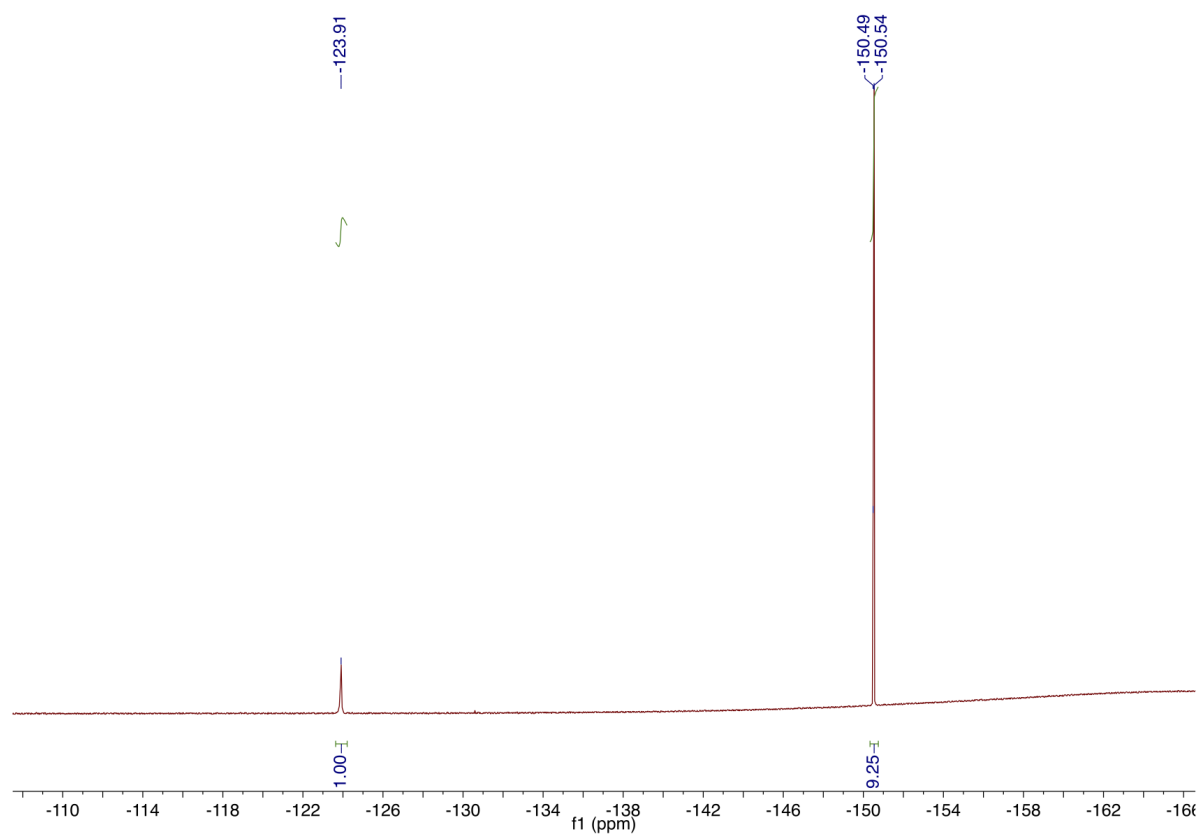

**Fig. S18**  $^{19}\text{F}$  NMR spectrum of compound **4** in  $\text{D}_2\text{O}$ .
